# Supplementary material for: Association of Enhanced Limbic Response to Threat With Decreased Cortical Facial Recognition Memory Response in Schizophrenia
Source: Atypon-hosted journal article supplement (doi:10.1176/appi.ajp.2009.09060808), 2010-03-02
Supplement: ajp_167_04_418_01.pdf [file ajp_167_04_418_01.pdf]

## SUPPLEMENTARY METHODS

### *Participant Demographics*

Patients and controls had similar gender (Wilcoxon  $z=1.0$ ,  $p=0.30$ ), age (patients: mean age 37.6 years,  $SD=8.5$ ; controls: mean 39.0 years,  $SD=10.6$ ; Wilcoxon  $z=-0.443$ ,  $p=0.64$ ), years of education (patients: mean 14.3 years,  $SD=2.1$ ; controls: mean 14.7 years,  $SD=2.2$ ; Wilcoxon  $z=0.29$ ,  $p=0.78$ ), and level of parental education (patients: mean 14.1 years,  $SD=2.9$ ; controls: mean 13.5 years,  $SD=2.9$ ; Wilcoxon  $z=-0.6$ ,  $p=0.53$ ). The age of onset of psychotic symptoms in the context of functional decline was 22.9 years ( $SD=7.3$ ), with an illness duration of 15.3 years ( $SD=11.0$ ).

### *Participant Assessment Procedure*

The participants underwent standardized assessment procedures, including medical, neurological, and psychiatric evaluations as well as laboratory tests. The psychiatric evaluation for patients included a clinical assessment; a structured interview; a history obtained from family, care providers, and records; and scale scores for measuring symptoms administered by investigators trained to a criterion reliability of intraclass correlation=0.90. The patients had a DSM-IV diagnosis of schizophrenia or schizoaffective disorder (depressed type), established in a consensus conference based on all information available, and had no history of other disorders or events affecting brain function. The comparison subjects underwent the same evaluation procedures. They had no history of major psychiatric illness personally or in first-degree relatives.

### *fMRI Procedures*

Participants were required to demonstrate understanding of the task instructions, the response device, and complete one trial of practice prior to acquisition of face memory data. Earplugs were used to muffle scanner noise and head fixation was aided by foam-rubber restraints mounted on the head coil. Stimuli were rear-projected to the center of the visual field using a PowerLite 7300 video projector (Epson America, Inc.; Long Beach, CA) and viewed through a head coil mounted mirror. Stimulus presentation was synchronized with image acquisition using the Presentation software package (Neurobehavioral Systems, Inc., Albany, CA). Subjects were randomly assigned to use their dominant or non-dominant hand; responses were recorded via a non-ferromagnetic keypad (fORP; Current Designs, Inc.; Philadelphia, PA).

### *Image Acquisition*

BOLD fMRI was acquired with a Siemens Trio 3 Tesla (Erlangen, Germany) system using a whole-brain, single-shot gradient-echo (GE) echoplanar (EPI) sequence with the following parameters: TR/TE=2000/32 ms, FOV=220 mm, matrix= 64 X 64, slice thickness/gap=3/0mm, 40 slices, effective voxel resolution of 3 x 3 x 3mm. To reduce partial volume effects in orbitofrontal regions, EPI was acquired obliquely (axial/coronal). The slices provided adequate brain coverage, from the superior cerebellum and inferior temporal lobe ventrally to the hand-motor area in the primary motor cortex dorsally. Prior to time-series acquisition, a 5-minute magnetization-prepared, rapid acquisition gradient-echo T1-weighted image (MPRAGE, TR 1620ms, TE 3.87 ms, FOV 250 mm, matrix 192x256, effective voxel resolution of 1 x 1 x 1mm)

was collected for anatomic overlays of functional data and to aid spatial normalization to a standard atlas space (1).

### *Image Preprocessing*

fMRI data were preprocessed and analyzed using FEAT (fMRI Expert Analysis Tool) Version 5.1, part of FSL (FMRIB's Software Library, [www.fmrib.ox.ac.uk/fsl](http://www.fmrib.ox.ac.uk/fsl)). Images were slice-time corrected, motion corrected to the median image using a tri-linear interpolation with six degrees of freedom (2), high pass filtered (100s), spatially smoothed (6mm FWHM, isotropic), and grand-mean scaled using mean-based intensity normalization. BET was used to remove non-brain areas (3). The median functional and anatomical volumes were coregistered, and then transformed into the standard anatomical space (T1 MNI template, voxel dimensions of 2x2x2 mm) using tri-linear interpolation. Subject level time-series statistical analysis was carried out using FILM (FMRIB's Improved General Linear Model) with local autocorrelation correction (4). Condition events were modeled with a canonical hemodynamic response function and its temporal derivative.

## SUPPLEMENTARY TABLES

**Table S1. Whole brain analysis of the HIT-CR contrast**

| Cluster                       | Hem | Max Z | Count | Peak (x, y, z) |
|-------------------------------|-----|-------|-------|----------------|
| <i>Controls</i>               |     |       |       |                |
| Large cluster (inc PCC)       | B   | 4.53  | 6795  | 12, -86, -4    |
| Inferior parietal lobule      | L   | 3.39  | 2227  | -54, -44, 42   |
| Anterior cingulate            | B   | 4.14  | 1556  | -2, 20, 46     |
| Nucleus Accumbens             | L   | 4.02  | 1331  | -8, 8, -8      |
| Pallidum                      | R   | 4.29  | 808   | 12, 6, -2      |
| Orbitofrontal cortex          | L   | 3.51  | 532   | -24, 18, -14   |
| Middle frontal gyrus          | L   | 3.79  | 440   | -52, 12, 38    |
| Superior frontal gyrus        | R   | 3.33  | 323   | 14, 62, 22     |
| Inferior parietal lobule      | R   | 4.02  | 228   | 38, -30, 38    |
| Anterior cingulate            | R   | 3.35  | 212   | 4, 46, 0       |
| Middle temporal gyrus         | L   | 3.05  | 142   | -66, -34, -14  |
| Superior frontal gyurs        | L   | 3.68  | 113   | -26, 46, 26    |
| Insula                        | R   | 3.24  | 112   | 38, 4, 6       |
| <i>Patients</i>               |     |       |       |                |
| Inferior parietal lobule      | R   | 3.71  | 253   | 54, -36, 22    |
| Angular gyrus                 | L   | 3.12  | 218   | -52, -56, 16   |
| Inferior parietal lobule      | L   | 3.49  | 189   | -36, -54, 46   |
| Caudate                       | R   | 3.79  | 173   | 10, 8, 0       |
| Lingual gyrus                 | R   | 3.11  | 117   | 24, -50, -6    |
| <i>Controls &gt; Patients</i> |     |       |       |                |
| Posterior cingulate           | R   | 3.23  | 240   | -6, -40, 26    |
| Occipital fusiform gyrus      | R   | 3,04  | 187   | 18, -86, -16   |
| Middle frontal gyrus          | R   | 3.52  | 147   | 46, 24, 32     |
| <i>Patients &gt; Controls</i> | -   | -     | -     | -              |

**Table S2. Whole brain analysis of the THREAT – NON-THREAT contrast**

| Cluster                       | Hem | Max Z | Count | Peak (x, y, z) |
|-------------------------------|-----|-------|-------|----------------|
| <i>Controls</i>               |     |       |       |                |
| Middle temporal gyrus         | L   | 3.15  | 177   | -70, -38, 2    |
| Orbitofrontal cortex          | R   | 3.22  | 137   | 44, 56, -12    |
| Superior temporal gyrus       | L   | 3.53  | 127   | -48, -14, -8   |
| <i>Patients</i>               |     |       |       |                |
|                               | -   | -     | -     | -              |
| <i>Controls &gt; Patients</i> |     |       |       |                |
|                               | -   | -     | -     | -              |
| <i>Patients &gt; Controls</i> |     |       |       |                |
|                               | -   | -     | -     | -              |

**Table S3. Whole brain analysis of functional connectivity with the left amygdala**

| Cluster                               | Hem | Max Z | Count  | Peak (x, y, z) |
|---------------------------------------|-----|-------|--------|----------------|
| <i>Controls: Positive Correlation</i> |     |       |        |                |
| Large limbic cluster                  | B   | 9.37  | 13,915 | -22, -6, -18   |
| <i>Controls: Negative Correlation</i> |     |       |        |                |
| Large frontal cluster                 | R   | 5.68  | 12,033 | 44, 22, 38     |
| Precuneous                            | R   | 5.03  | 4,157  | 2, -82, 46     |
| Inferior parietal lobule              | L   | 5.15  | 2,505  | 50, -44, 36    |
| Postcentral gyrus                     | R   | 3.44  | 108    | 64, -6, 24     |
| <i>Patients: Positive Correlation</i> |     |       |        |                |
| Large limbic cluster                  | B   | 15.6  | 12,847 | -18, -8, -20   |
| <i>Patients: Negative Correlation</i> |     |       |        |                |
| Large frontoparietal cluster          | B   | 5.36  | 6,163  | 8, 48, 44      |
| Large parietal cluster                | L   | 4.75  | 4,827  | -70, -42, 30   |
| Paracentral lobule                    | R   | 4.29  | 280    | 6, -10, 46     |
| <i>Controls &gt; Patients</i>         |     |       |        |                |
| Thalamus                              | L   | 4.47  | 841    | -18, -24, 16   |
| Parietal white matter                 | R   | 4.13  | 266    | 26, -42, 24    |
| Postcentral gyrus                     | L   | 3.81  | 241    | -22, -28, 46   |
| Cuneus                                | B   | 3.36  | 162    | -10, -82, 12   |
| Middle temporal gyrus                 | R   | 3.68  | 159    | 60, -70, 20    |
| Superior temporal gyrus               | L   | 3.52  | 117    | -56, -14, 0    |
| Middle temporal gyrus                 | L   | 3.70  | 109    | -58, -70, 22   |
| <i>Patients &gt; Controls</i>         |     |       |        |                |
| Middle frontal gyrus                  | R   | 3.28  | 179    | 44, 24, 38     |
| Insula                                | R   | 4.31  | 169    | 46, -4, -8     |
| Middle frontal gyrus                  | R   | 2.97  | 126    | 52, 34, 18     |
| Orbitofrontal cortex                  | R   | 4.05  | 111    | 42, 20, -12    |
| Midbrain                              | R   | 3.70  | 103    | 12, -22, -12   |

## SUPPLEMENTARY REFERENCES

1. Talairach J, Tournoux P: Co-planar stereotaxic atlas of the human brain. New York, Thieme, 1988
2. Jenkinson M, Bannister P, Brady M, Smith S: Improved optimization for the robust and accurate linear registration and motion correction of brain images. *Neuroimage* 2002; 17(2):825-41
3. Smith SM: Fast robust automated brain extraction. *Hum Brain Mapp* 2002; 17(3):143-55
4. Woolrich MW, Ripley BD, Brady M, Smith SM: Temporal autocorrelation in univariate linear modeling of FMRI data. *Neuroimage* 2001; 14(6):1370-86
